# Supplementary material
Source: Springer Nature journal article supplement (https://www.springermedizin.de/resource/supplementary/12985_2010_815_MOESM1_ESM.pdf/9609260)

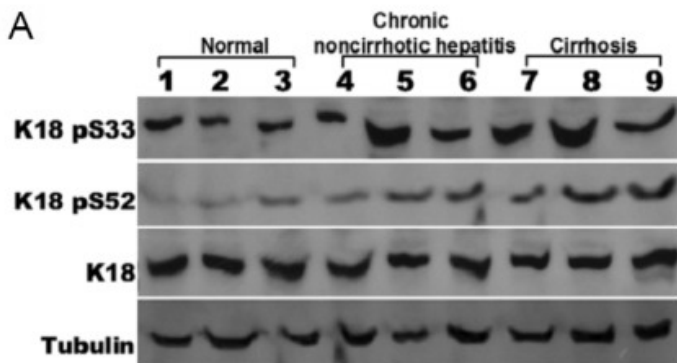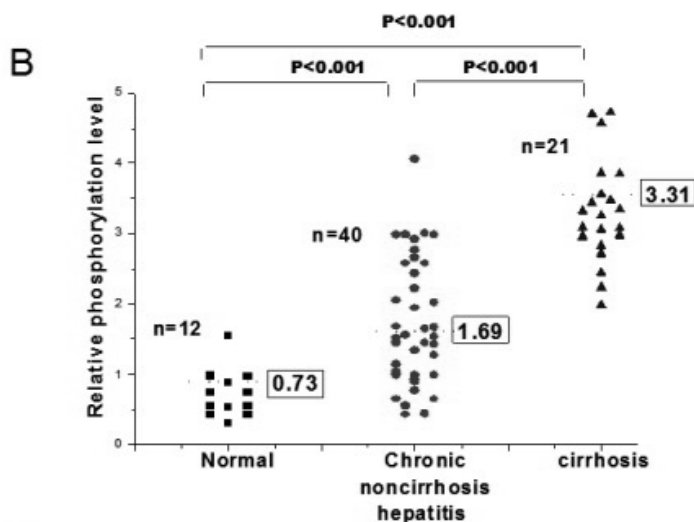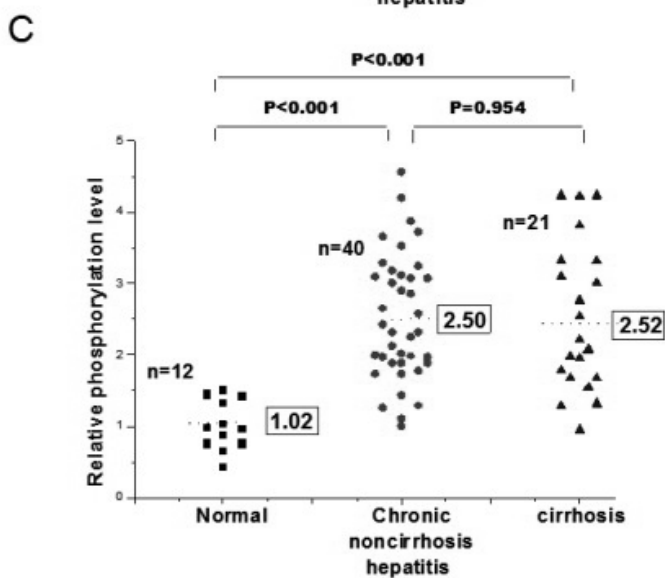

Supplement: MOESM1 [file 9609260]
